# Supplementary material for: Antihypertensive Activity of the Alkaloid Aspidocarpine in Normotensive Wistar Rats
Source: MDPI journal article supplement (doi:10.3390/molecules27206895), 2022-10-14
Supplement: s1 [file s1]

# Antihypertensive Activity of the Alkaloid Aspidocarpine in Normotensive Wistar Rats

Noemi Oliveira Monteiro<sup>1</sup>, Theresa de Moura Monteiro<sup>3</sup>, Thalya Soares R. Nogueira<sup>2</sup>,  
Jacqueline Rodrigues Cesar<sup>2</sup>, Lara Pessanha S. Nascimento<sup>2</sup>, Karoline Azerêdo Campelo<sup>2</sup>,  
Graziela Rangel Silveira<sup>2</sup>, Fernanda Antunes<sup>3</sup>, Daniela Barros de Oliveira<sup>1</sup>, Almir de  
Carvalho Junior<sup>4</sup>, Raimundo Braz-Filho<sup>2,5</sup> and Ivo José Curcino Vieira<sup>1,2\*</sup>

<sup>1</sup>Laboratório de Tecnologia de Alimentos, CCTA, Universidade Estadual do Norte Fluminense  
Darcy Ribeiro, Campos dos Goytacazes 28013-602, Brazil

<sup>2</sup>Laboratório de Ciências Químicas, CCT, Universidade Estadual do Norte Fluminense Darcy  
Ribeiro, Campos dos Goytacazes 28013-602, Brazil

<sup>3</sup>Laboratório de Clínica e Cirurgia Animal, CCTA, Universidade Estadual do Norte Fluminense  
Darcy Ribeiro, Campos dos Goytacazes 28013-602, Brazil

<sup>4</sup>Instituto Federal de Educação, Ciência e Tecnologia da Bahia, campus Vitória da Conquista,  
45078-300, Brazil

<sup>5</sup>Departamento de Química Orgânica, Instituto de Química, Universidade Federal Rural do Rio  
de Janeiro, Seropédica, Rio de Janeiro 20000-000

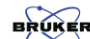

**Figure S1:**  $^1\text{H}$  NMR spectrum of Aspidocarpine ( $\text{CDCl}_3$ , 500 MHz).

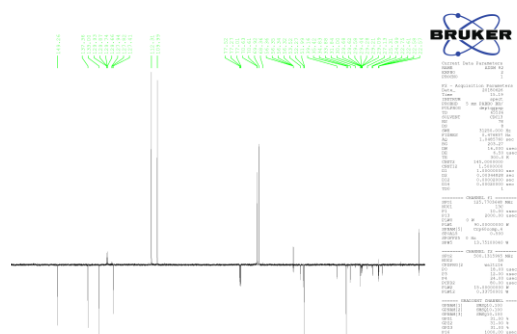

**Figure S2:**  $^{13}\text{C}$  DEPTQ NMR spectrum of Aspidocarpine ( $\text{CDCl}_3$ , 125 MHz).

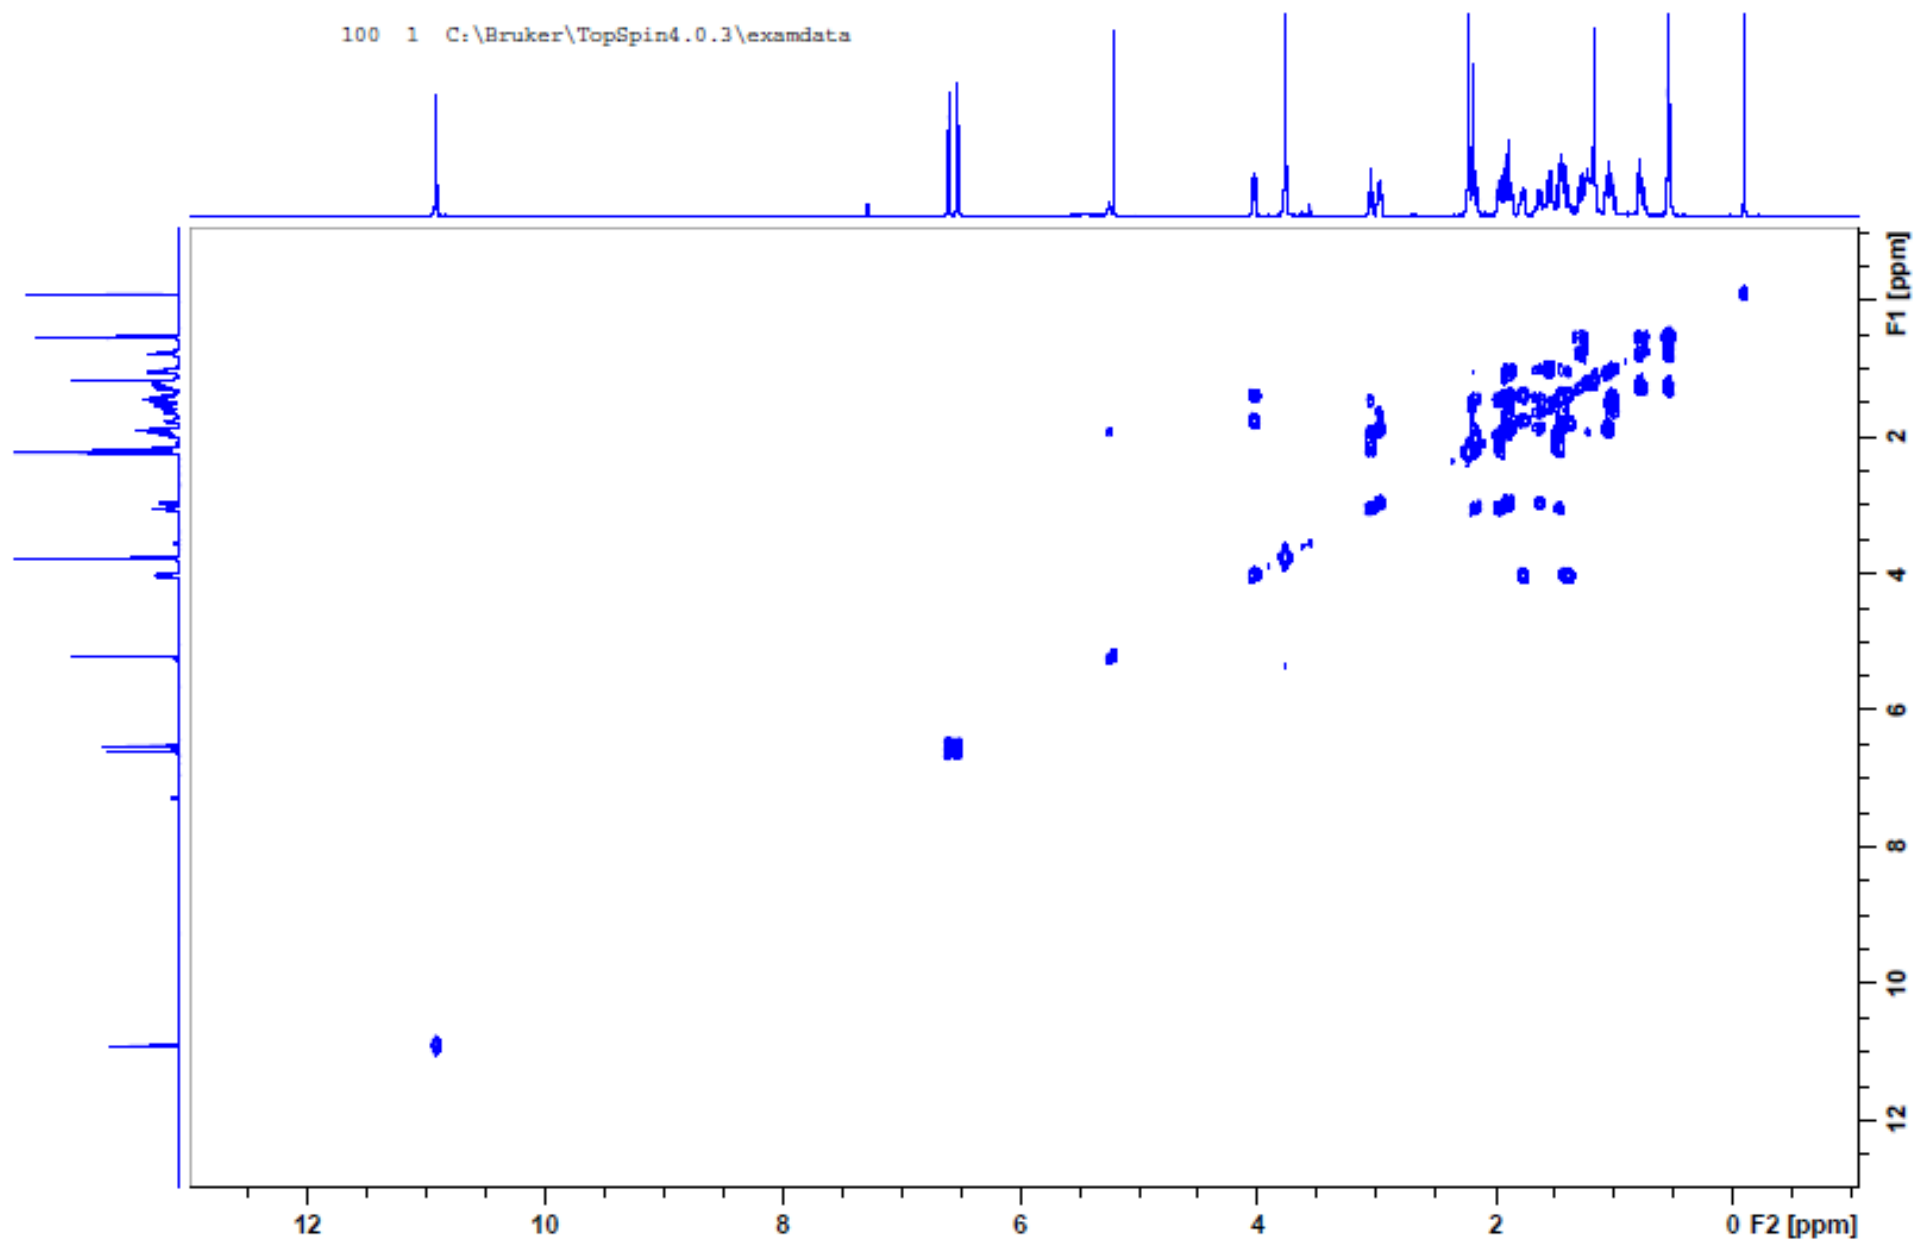

**Figure S3:**  $^1\text{H}$ - $^1\text{H}$ -COSY spectrum of Aspidocarpine ( $\text{CDCl}_3$ , 500 MHz).

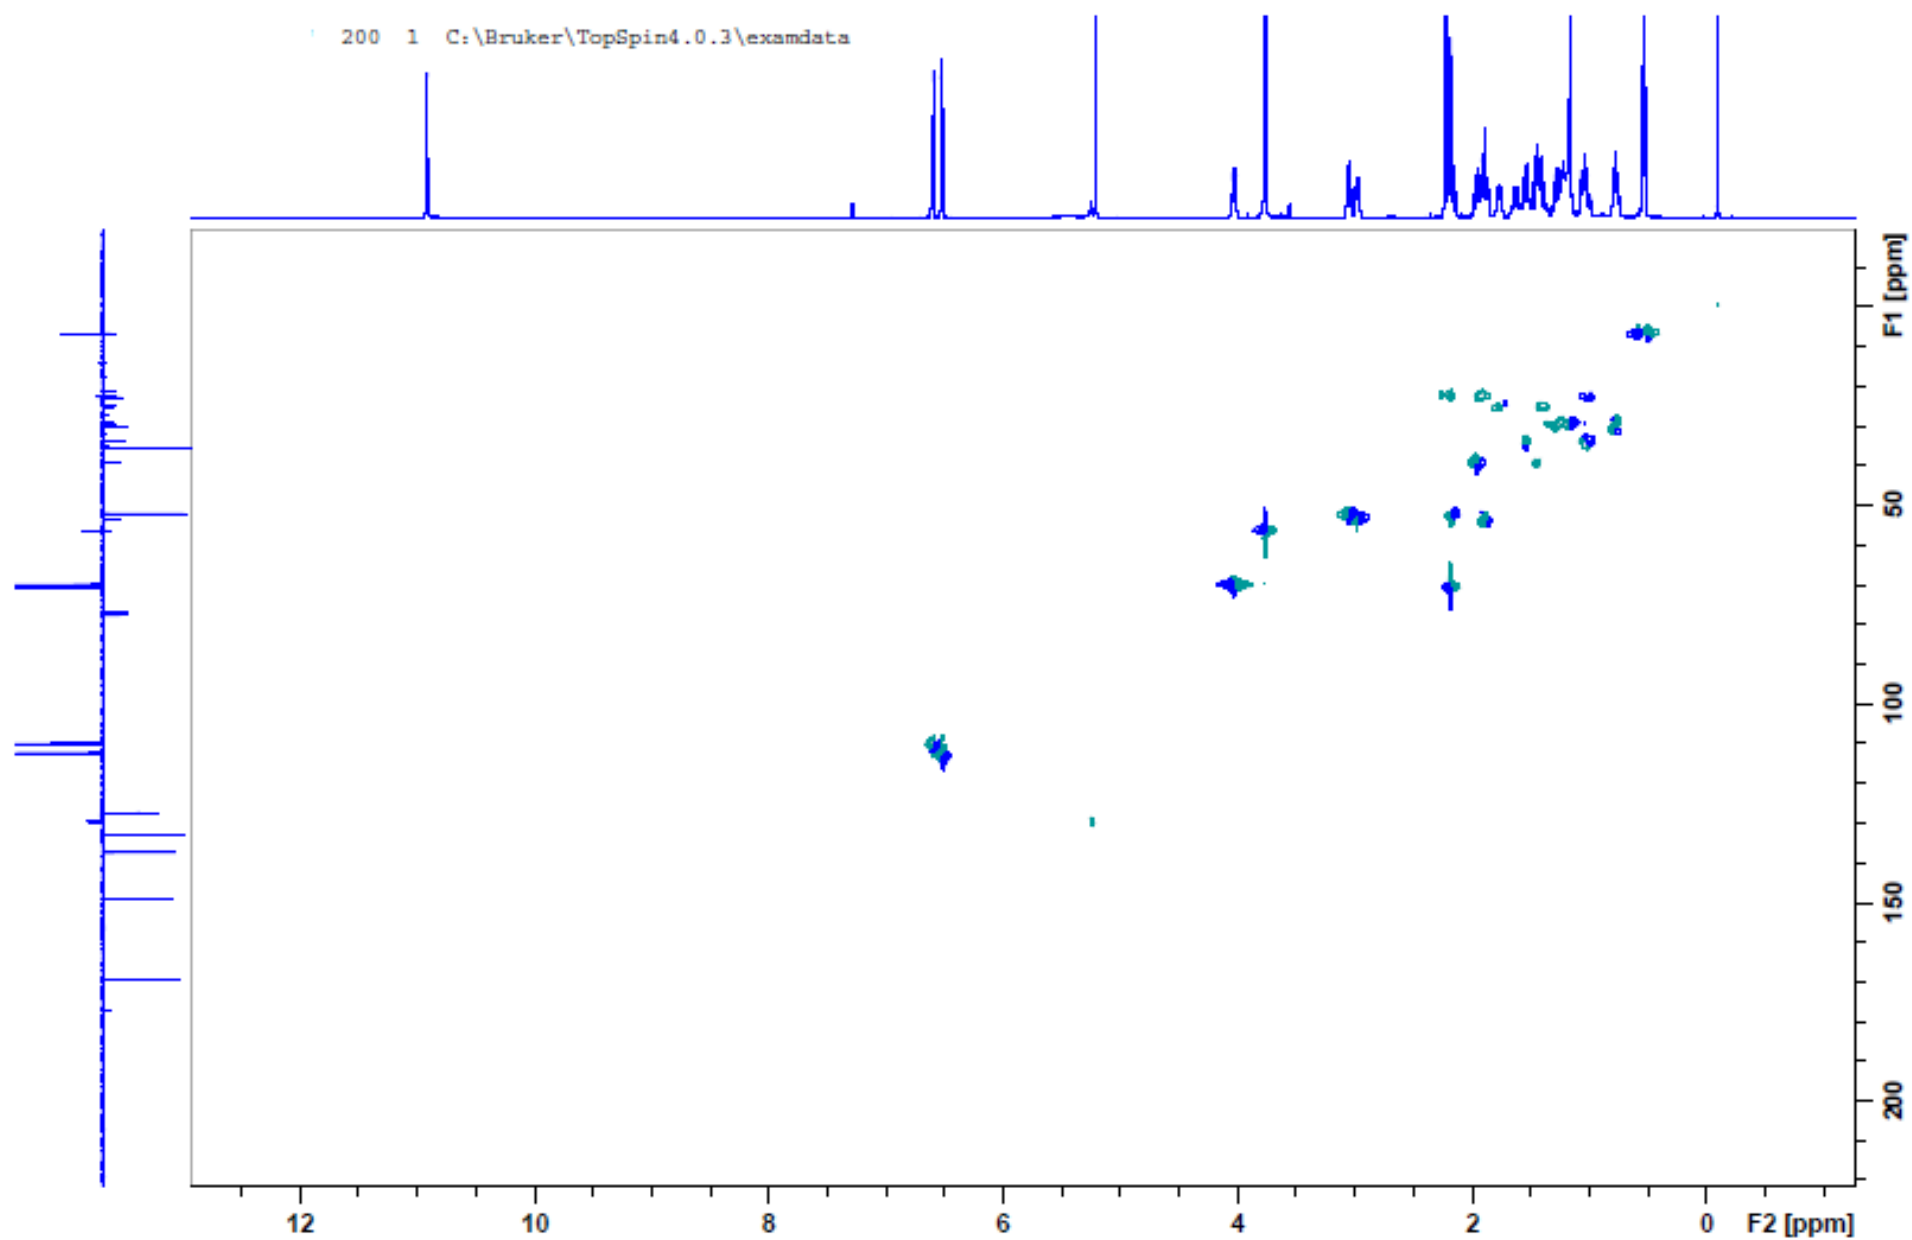

**Figure S.4:** HSQC spectrum of Aspidocarpine (CDCl<sub>3</sub>, 500 MHz).

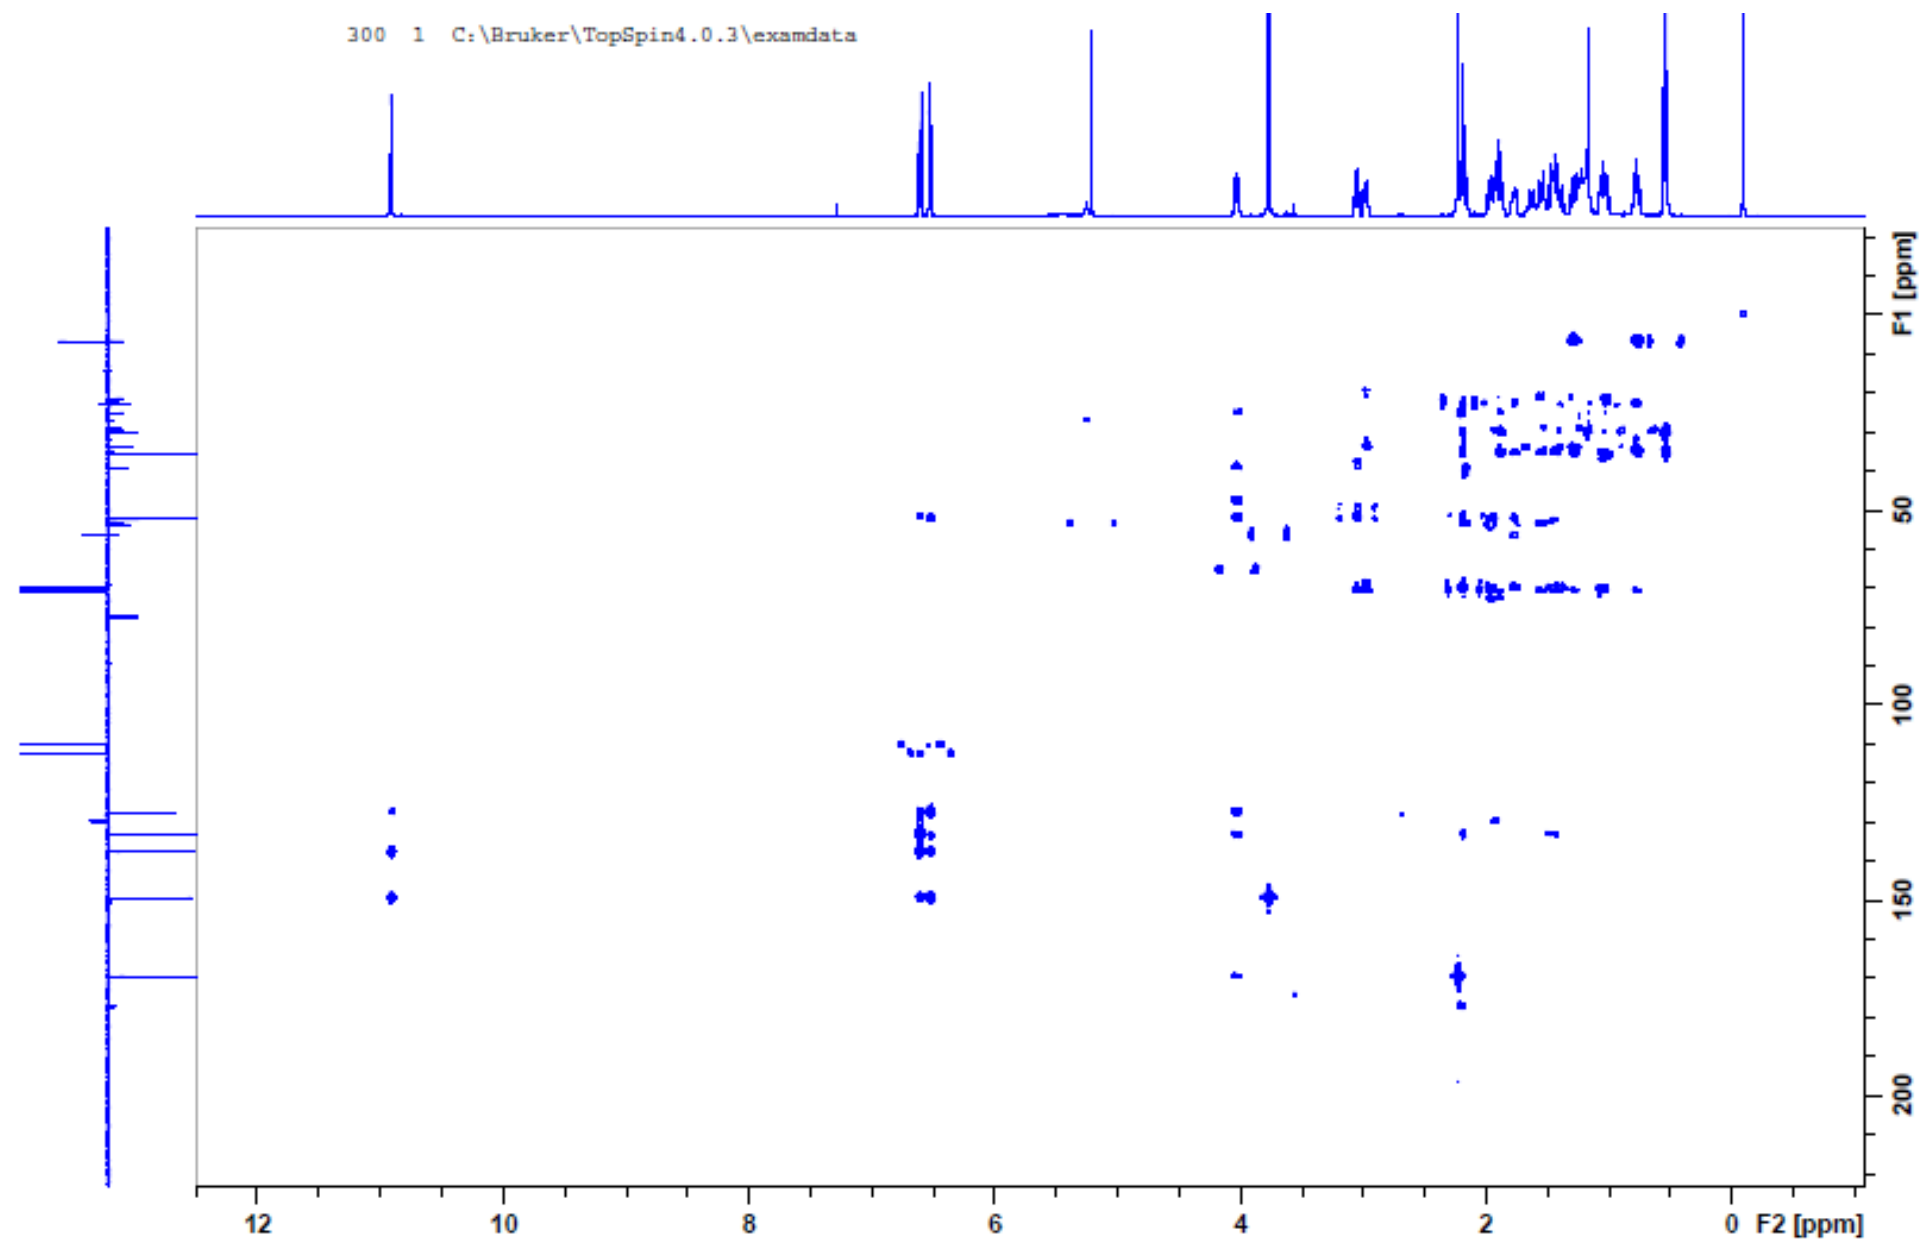

Figure S.5: HMBC spectrum of Aspidocarpine (CDCl<sub>3</sub>, 500 MHz).

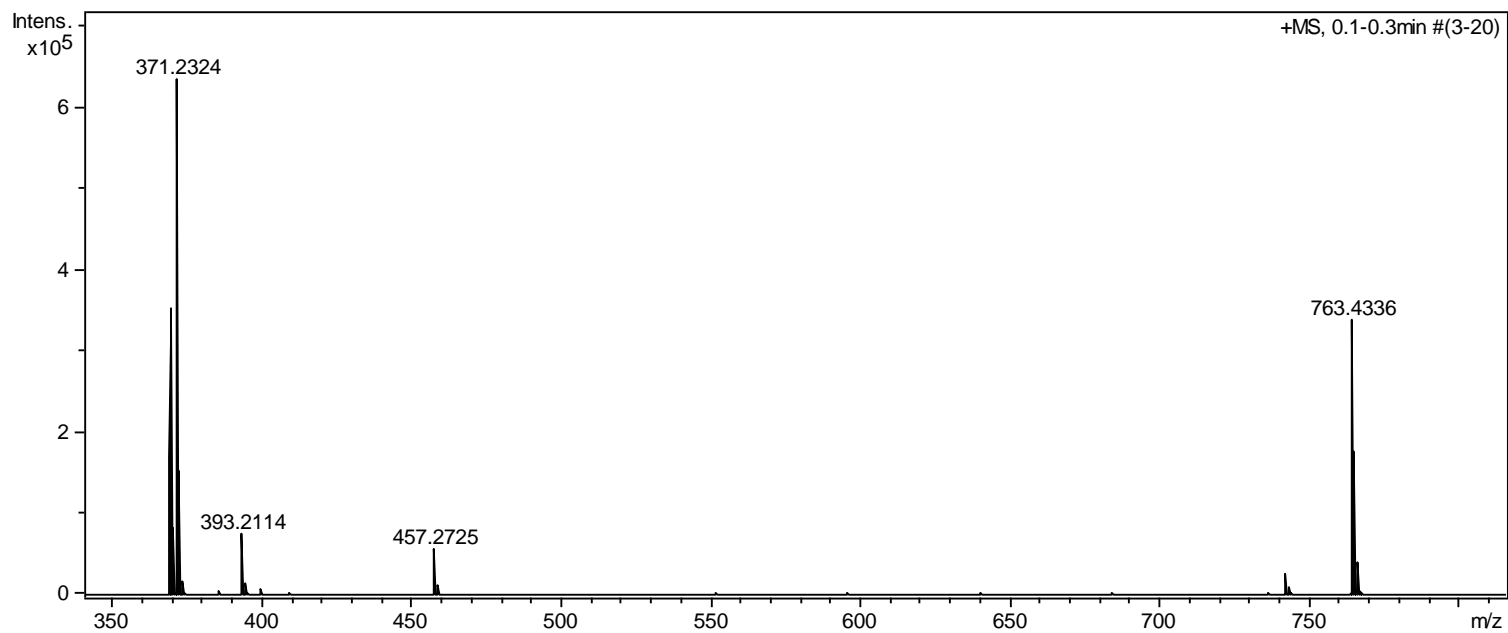

**Figure S6:** High-resolution mass spectrum (HRESIMS/positive mode) of Aspidocarpine.

Line#:1 R.Time:15.042(Scan#:1566) MassPeaks:407  
 RawMode:Single 15.042(1566) BasePeak:124.10(6457659)  
 BG Mode:None

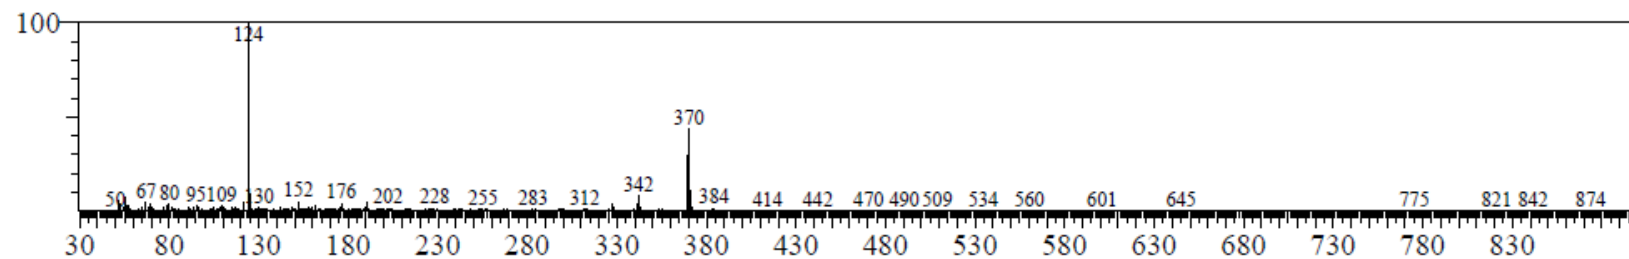

**Figure S7:** Low-resolution mass spectrum of Aspidocarpine.

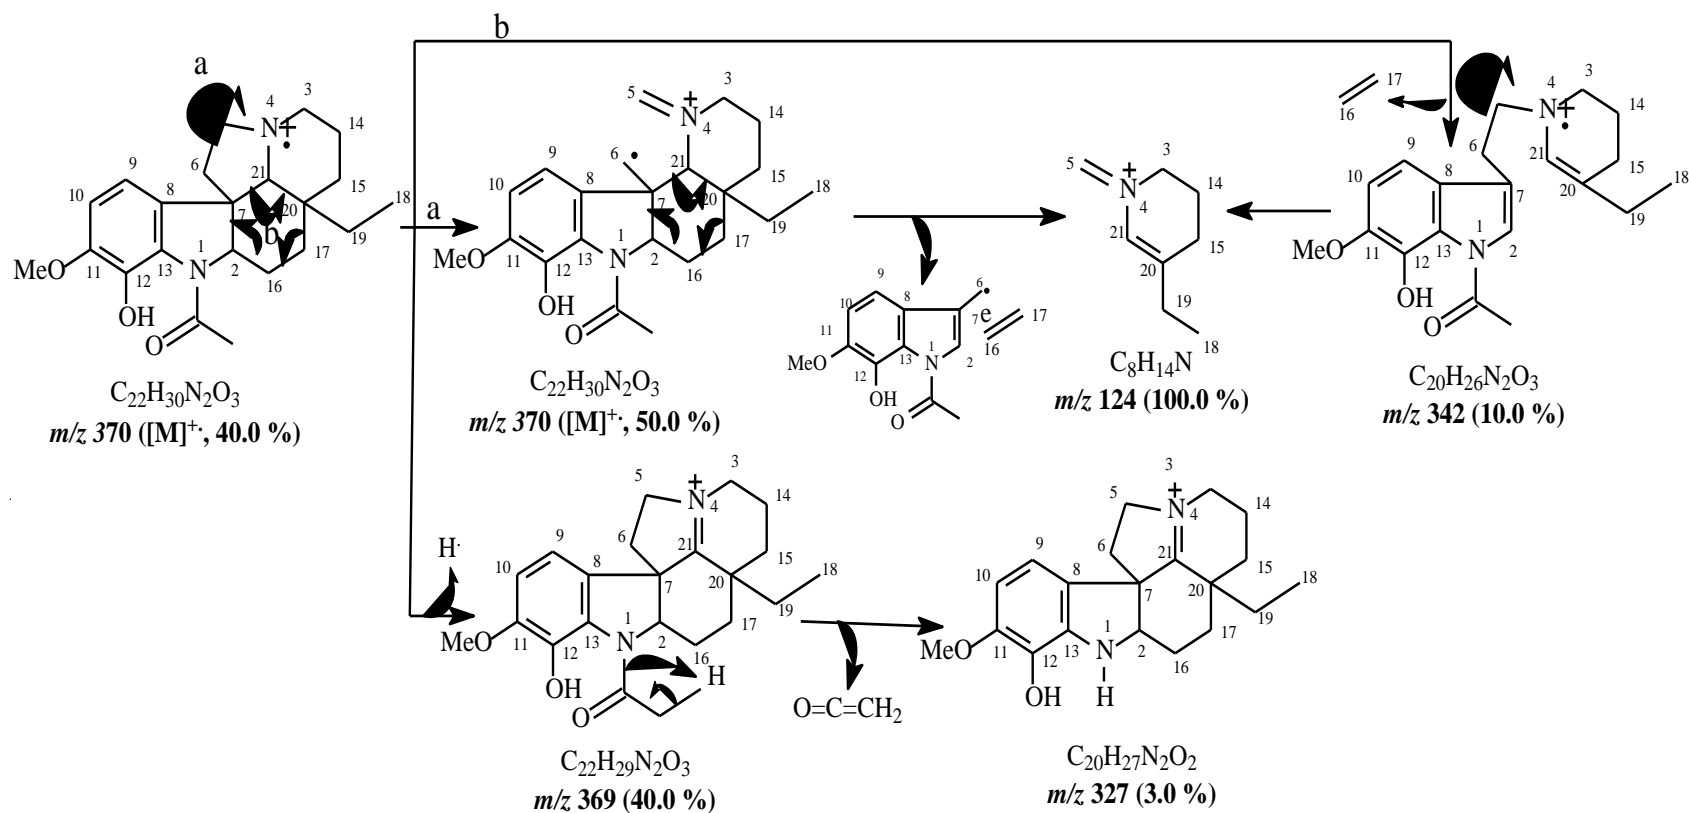

**Figure S8:** Proposal of mass spectra fragmentation of Aspidocarpine.



**Table S1:**  $^1\text{H}$  (500 MHz) and  $^{13}\text{C}$  (125 MHz) NMR spectral data for Aspidocarpine, including results obtained by heteronuclear 2D shift-correlated HSQC ( $^1J_{\text{CH}}$ ) and HMBC ( $^nJ_{\text{CH}}$ ,  $n=2$  and 3) and comparison with values described in the literature [16, 17]), in  $\text{CDCl}_3$  as solvent. Chemical shifts ( $\delta$ , ppm) and coupling constants ( $J$ , Hz, in parenthesis).

|                       | HMQC                |                             | HMBC              |                    | [17]                |                                              | [16]                |                                            |
|-----------------------|---------------------|-----------------------------|-------------------|--------------------|---------------------|----------------------------------------------|---------------------|--------------------------------------------|
|                       | $\delta_{\text{C}}$ | $\delta_{\text{H}}$         | $^2J_{\text{CH}}$ | $^3J_{\text{CH}}$  | $\delta_{\text{C}}$ | $\delta_{\text{H}}$                          | $\delta_{\text{C}}$ | $\delta_{\text{H}}$                        |
| <b>C</b>              |                     |                             |                   |                    |                     |                                              |                     |                                            |
| 7                     | 51.99               | -                           | H-2               | 2H-5; H-9          | 52.2                | -                                            | 52.20               | -                                          |
| 8                     | 132.99              | -                           | H-9               | H-2; H-10; H-21    | 133.1               | -                                            | 133.13              | -                                          |
| 11                    | 149.26              | -                           | H-10              | H-9; MeO-11; HO-12 | 149.4               |                                              | 149.35              | -                                          |
| 12                    | 137.36              | -                           | HO-12             | H-10               | 137.5               |                                              | 137.47              | -                                          |
| 13                    | 127.40              | -                           |                   | H-2; H-9; HO-12    | 127.5               | -                                            | 127.51              | -                                          |
| 20                    | 35.42               | -                           | 2H-19             | H-16a; 3H-18       | 35.5                | -                                            | 35.46               | -                                          |
| 1'                    | 169.28              | -                           | 3H-2'             | H-2                | 169.3               | -                                            | 169.31              | -                                          |
| <b>CH</b>             |                     |                             |                   |                    |                     |                                              |                     |                                            |
| 2                     | 69.31               | 4.03 (dd, 11.3, 6.2)        |                   |                    | 70.3                |                                              | 70.25               | 4.07 (dd, 11.0, 6.0))                      |
| 9                     | 112.31              | 6.52 (d, 8.1)               | H-10              |                    | 112.4               | 6.61 (d, 8.0)                                | 112.36              | 6.61 (d, 8.0)                              |
| 10                    | 109.99              | 6.60 (d, 8.1)               | H-9               |                    | 110.0               | 6.69 (d, 8.0)                                | 110.04              | 6.69 (d, 8.0)                              |
| 21                    | 70.63               | 2.20 (s)                    |                   | H-3a; H-5a; 2H-19  | 70.6                | 2.25 (s)                                     | 70.62               | 2.25 (s)                                   |
| <b>CH<sub>2</sub></b> |                     |                             |                   |                    |                     |                                              |                     |                                            |
| 3                     | 53.52               | 2.97 (dl, 10.9(1.90         |                   |                    | 53.7                | 3.04 (dm, 12<br>1.98 (td, 12.0, 4.0)         | 53.67               | 3.04 (dm, 12.0) 1.98 (td, 12.0, 4.0)       |
| 5                     | 52.27               | 3.06 (td, 9.0, 2.1)<br>2.15 |                   |                    | 52.4                | 3.12 (m),<br>2.27 (m)                        | 52.43               | 3.12 (m),<br>2.27 (m)                      |
| 6                     | 39.16               | 1.98, 1.45                  | H-5b              | H-2                | 39.4                | 2.04 (m), 1.57(m)                            | 39.37               | 2.04 (m), 1.57 (m)                         |
| 14                    | 21.27               | 2.20, 1.92                  | H-15b             |                    | 21.5                | 1.72(tm, 12.0)<br>1.53 (dm, 12.0, 4.0)       | 21.50               | 1.72 (tm, 12.0), 1.53 (dm, 12.0)           |
| 15                    | 33.88               | 1.60, 1.02                  |                   | H-3a               | 34.0                | 1.65 (dt, 12.0, 4.0)<br>1.11 (td, 12.0, 4.0) | 34.02               | 1.65 (dt, 12.0, 4.0), 1.11 (dt, 12.0, 4.0) |
| 16                    | 24.99               | 1.88, 1.52                  |                   |                    | 25.1                | 1.86 (m), 1.52 (m)                           | 25.10               | 1.86 (m), 1.52 (m)                         |
| 17                    | 22.75               | 1.98, 1.20                  |                   | H-19b              | 22.9                | 2.00 (td, 14.0, 12.0)<br>1.15 (dm, 12.0)     | 22.92               | 2.00 (td, 12.0, 14.0),<br>1.15 (dm, 12.0)  |
| 19                    | 30.00               | 1.25, 0.80                  | 3H-18             |                    | 30.0                | 1.44 (m), 0.93 (m)                           | 30.03               | 1.44 (m), 0.93 (m)                         |
| <b>CH<sub>3</sub></b> |                     |                             |                   |                    |                     |                                              |                     |                                            |
| 18                    | 6.71                | 0.64 (t, 7.4)               | 2H-19             |                    | 6.8                 | 0.63 (t, 7.5)                                | 6.76                | 0.63 (d, 7.5)                              |
| MeO                   | 56.36               | 3.77 (s)                    |                   |                    | 56.4                | 3.88 (s)                                     | 56.43               | 3.88 (s)                                   |
| 2'                    | 22.60'              | 2.23 (s)                    |                   |                    | 22.7                | 2.33 (s)                                     | 22,68               | 2.33 (s)                                   |
| HO                    | -                   | 10.91 (s)                   |                   |                    | -                   | 10.98 (s)                                    | -                   | 10.98 (s)                                  |
